# Supplementary material
Source: PubMed Central journal article supplement (PMC8312885)
Supplement: ehp8421.s001.acco.pdf [file ehp8421.s001.acco.pdf]

**Note to readers with disabilities:** *EHP* strives to ensure that all journal content is accessible to all readers. However, some figures and Supplemental Material published in *EHP* articles may not conform to [508 standards](#) due to the complexity of the information being presented. If you need assistance accessing journal content, please contact [ehp508@niehs.nih.gov](mailto:ehp508@niehs.nih.gov). Our staff will work with you to assess and meet your accessibility needs within 3 working days.

### **Supplemental Material**

#### **Associations between Exposure to Organochlorine Chemicals and Endometriosis: A Systematic Review of Experimental Studies and Integration of Epidemiological Evidence**

Komodo Matta, Meriem Koual, Stéphane Ploteau, Xavier Coumoul, Karine Audouze, Bruno Le Bizec, Jean-Philippe Antignac, and German Cano-Sancho

#### **Table of Contents**

##### **Section 1: Tables**

**Table S1.** Search string for PUBMED.

**Table S2.** List of all organochlorine chemicals identified as Persistent Organic Pollutants listed in the Stockholm Convention (UNEP 2017).

**Table S3.** Data extraction items.

**Table S4.** Summary of confidence rating procedure (OHAT, 2015).

**Table S5.** Determination of initial confidence rating based on confidence features of study design.

**Table S6.** Translation of confidence rating into level of evidence.

**Table S7.** Inventory of chemicals studied in *in vivo* and *in vitro* studies and the number of experiments studying each chemical.

**Table S8.** Inventory of cell types of *in vitro* studies and the number of experiments using each cell type.

##### **Section 2: Figures**

###### **2.1 Methods: Data Extraction Process Examples**

**Figure S1.** Example of general study data form in HAWC.

**Figure S2.** Example of animal bioassay (*in vivo*) experiment(s) form in HAWC.

**Figure S3.** Example of animal bioassay (*in vivo*) experiment data form in HAWC.

**Figure S4.** Example of animal bioassay (*in vivo*) group data form in HAWC.

**Figure S5.** Example of dose-response endpoint visualisation in HAWC.

## 2.2 Methods: Hazard Identification

**Figure S6.** Hazard Identification Scheme.

**Figure S7.** Risk of Bias Assessment of individual studies on all primary endpoints. Ratings are illustrated by percentage (out of 25 total studies; n = 16 for *in vivo* studies, n = 9 for *in vitro* studies). Interactive figure with additional information and justifications in HAWC Figure S7.

**Figure S8.** Risk of bias (RoB) heatmap for TCDD on *in vivo* onset. Key elements are marked by \*. Tiers 1-3 are tiered rankings as determined by responses to the RoB questions. Tier 1 (T1) study responses are mostly “definitely low” and “probably low”. Tier 3 (T3) responses are mostly “not reported” or “probably high” or “definitely high”. Interactive figure with additional information and justifications in HAWC Figure S8.

**Figure S9.** Risk of bias (Rob) heatmap for TCDD on *in vivo* lesion growth. Key elements are marked by \*. Tiers 1-2 are tiered rankings as determined by responses to the RoB questions. Tier 1 (T1) study responses are mostly “definitely low” and “probably low”. Tier 2 (T2) responses are mostly “probably low” with some “not reported”. Interactive figure with additional information and justifications in HAWC Figure S9.

**Figure S10.** Risk of bias (RoB) heatmap for TCDD on *in vitro* migration/invasion. Key elements are marked by \*. Tiers 2-3 are tiered rankings as determined by responses to the RoB questions. Tier 2 (T2) responses are mostly “probably low” with some “not reported”. Tier 3 (T3) responses are mostly “not reported” or “probably high” or “definitely high”. Interactive figure with additional information and justifications in HAWC Figure S10.

**Figure S11.** Risk of bias (RoB) heatmap for TCDD on *in vitro* viability/proliferation. Key elements are marked by \*. Tiers 1-2 are tiered rankings as determined by responses to the RoB questions. Tier 1 (T1) study responses are mostly “definitely low” and “probably low”. Tier 2 (T2) responses are mostly “probably low” with some “not reported”. Interactive figure with additional information and justifications in HAWC Figure S11.

**Figure S12.** Tested doses of TCDD (pg/g TEQ/TCDD) in *in vitro* and *in vivo* studies plotted to compare with measured internal doses from human epidemiological studies.

## **Section 3: Risk of bias**

### **Risk of Bias Response Criteria**

### **References**

# 1. SECTION 1: TABLES

Table S1. Search string for PUBMED.

| Block    | Search Terms                                                                                                                                                                                                                                                                                                                                                                                                                                                                                                                                                                                                                                                                                                                                                                                                                                                                                                                                                                                                                                                                                                                                                                                                                                                                                                                                                                                                                                                                                                                                                                                                                                                                                                                                                                                                                                                                                                                                                                                                                                                                                                                                                                                                                                                                                                                                                                                                                                                                                                                                                                                                                                                                                                                                                                                                                                                                                                                                                                                                                                                                                                                                                                                                                                                                                                                                                                                                                                                                                                                                                                                                                                                                                                                                                               |
|----------|----------------------------------------------------------------------------------------------------------------------------------------------------------------------------------------------------------------------------------------------------------------------------------------------------------------------------------------------------------------------------------------------------------------------------------------------------------------------------------------------------------------------------------------------------------------------------------------------------------------------------------------------------------------------------------------------------------------------------------------------------------------------------------------------------------------------------------------------------------------------------------------------------------------------------------------------------------------------------------------------------------------------------------------------------------------------------------------------------------------------------------------------------------------------------------------------------------------------------------------------------------------------------------------------------------------------------------------------------------------------------------------------------------------------------------------------------------------------------------------------------------------------------------------------------------------------------------------------------------------------------------------------------------------------------------------------------------------------------------------------------------------------------------------------------------------------------------------------------------------------------------------------------------------------------------------------------------------------------------------------------------------------------------------------------------------------------------------------------------------------------------------------------------------------------------------------------------------------------------------------------------------------------------------------------------------------------------------------------------------------------------------------------------------------------------------------------------------------------------------------------------------------------------------------------------------------------------------------------------------------------------------------------------------------------------------------------------------------------------------------------------------------------------------------------------------------------------------------------------------------------------------------------------------------------------------------------------------------------------------------------------------------------------------------------------------------------------------------------------------------------------------------------------------------------------------------------------------------------------------------------------------------------------------------------------------------------------------------------------------------------------------------------------------------------------------------------------------------------------------------------------------------------------------------------------------------------------------------------------------------------------------------------------------------------------------------------------------------------------------------------------------------------|
| Exposure | <p>(("Aldrin" [MeSH] OR "aldrin" [All Fields] OR "Isodrin" [All Fields] OR "Aldrine" [All Fields] OR "Chlordan" [MeSH] OR "Chlordan" [All Fields] OR "Chlordane" [All Fields] OR "Octachlor" [All Fields] OR "Octachlordane" [All Fields] OR "Dichlorochlordene" [All Fields] OR "Chlordecone" [MeSH] OR "Chlordecone" [All Fields] OR "Kepone" [All Fields] OR "Dieldrin" [MeSH] OR "Dieldrin" [All Fields] OR "Alvit 55" [All Fields] OR "Alvit" [All Fields] OR "Dioldren" [All Fields] OR "Dioldrex" [All Fields] OR "Dioldrine" [All Fields] OR "Endrin" [MeSH] OR "endrin" [All Fields] OR "hexadrin" [All Fields] OR "HEOD" [All Fields] OR "Heptachlor" [MeSH] OR "Heptachlor" [All Fields] OR "Agroceres" [All Fields] OR "Heptox" [All Fields] OR "Heptachlore" [All Fields] OR "Hexachlorobenzene" [MeSH] OR "hexachlorobenzene" [All Fields] OR "Perchlorobenzene" [All Fields] OR "HCB" [All Fields] OR "Hexachlorobenzol" [All Fields] OR "Anticarie" [All Fields] OR ("Hexachlorobutadiene" [Supplementary Concept] OR "hexachlorobutadiene" [All Fields]) OR "hexachlorobutadiene" [Supplementary Concept] OR "hexachlorobutadiene" [All Fields] OR "hexachloro-1,3-butadiene" [All Fields] OR "Hexachlorbutadiene" [All Fields] OR "Perchlorobutadiene" [All Fields] OR "HCBD" [All Fields] OR "Alpha hexachlorocyclohexane" [All Fields] OR "alpha-hexachlorocyclohexane" [Supplementary Concept] OR "alpha-hexachlorocyclohexane" [All Fields] OR "alpha-HCH" [All Fields] OR "Beta hexachlorocyclohexane" [All Fields] OR "beta-hexachlorocyclohexane" [Supplementary Concept] OR "beta-hexachlorocyclohexane" [All Fields] OR "beta-HCH" [All Fields] OR "beta-HCH" [All Fields] OR "beta-Lindane" [All Fields] OR "beta-hexachlorocyclohexane" [All Fields] OR ("Lindane" [MeSH Terms] OR "lindane" [All Fields]) OR "Lindane" [Mesh] OR "Lindane" [All Fields] OR "hexachlorane" [All Fields] OR "gamma-HCH" [All Fields] OR "Benzene hexachloride" [All Fields] OR "gamma-BHC" [All Fields] OR "Hexicide" [All Fields] OR "gamma 666" [All Fields] OR "Jacutin" [All Fields] OR ("Mirex" [MeSH Terms] OR "mirex" [All Fields]) OR "Mirex" [MeSH] OR "Dechlorane" [All Fields] OR "Perchloropentacyclodecane" [All Fields] OR "Paramex" [All Fields] OR "Dodecachloropentacyclodecane" [All Fields] OR "Dodecaclor" [All Fields] OR ("Pentachlorobenzene" [Supplementary Concept] OR "pentachlorobenzene" [All Fields]) OR "Pentachlorobenzene" [All Fields] OR "PeCB" [All Fields] OR "Pentachlorbenzol" [All Fields] OR ("Pentachlorophenol" [MeSH Terms] OR "pentachlorophenol" [All Fields]) OR "Pentachlorophenol" [MeSH] OR "Pentachlorophenol" [All Fields] OR "Permite" [All Fields] OR "Pentachlorophenate" [All Fields] OR "Chlorophen" [All Fields] OR "Lauxtol" [All Fields] OR "Dowicide 7" [All Fields] OR "Fungifen" [All Fields] OR "Liroprem" [All Fields] OR ((Polychlorinated [All Fields] OR Dichlorinated [All Fields])</p> <p>OR Trichlorinated [All Fields] OR Tetrachlorinated [All Fields] OR Pentachlorinated [All Fields] OR Hexachlorinated [All Fields] OR Heptachlorinated [All Fields] OR Octachlorinated [All Fields]) AND ("naphthalenes" [MeSH Terms] OR "naphthalenes" [All Fields] OR "napthalene" [All Fields])) OR chloronaphthalene [All Fields] OR (Short-chain [All Fields] AND chlorinated [All Fields] AND ("paraffin" [MeSH Terms] OR "paraffin" [All Fields] OR "paraffins" [All Fields])) OR (Technical [All Fields] AND ("endosulfan" [MeSH Terms] OR "endosulfan" [All Fields])) OR "115-29-7" [All Fields] OR "endosulfan sulfate" [All Fields] OR "Tetrabromodiphenyl ether" [All Fields] OR "pentabromodiphenyl ether" [Supplementary Concept] OR "pentabromodiphenyl ether" [All Fields] OR</p> |

|         |                                                                                                                                                                                                                                                                                                                                                                                                                                                                                                                                                                                                                                                                                                                                                                                                                                                                                                                                                                                                                                                                                                                                                                                                                                                                                                                                                                                                                                                                                                                                                                                                                                                                                                                                                                                                                                                                                                                                                                                                                                                                                                                                                                                                                                      |
|---------|--------------------------------------------------------------------------------------------------------------------------------------------------------------------------------------------------------------------------------------------------------------------------------------------------------------------------------------------------------------------------------------------------------------------------------------------------------------------------------------------------------------------------------------------------------------------------------------------------------------------------------------------------------------------------------------------------------------------------------------------------------------------------------------------------------------------------------------------------------------------------------------------------------------------------------------------------------------------------------------------------------------------------------------------------------------------------------------------------------------------------------------------------------------------------------------------------------------------------------------------------------------------------------------------------------------------------------------------------------------------------------------------------------------------------------------------------------------------------------------------------------------------------------------------------------------------------------------------------------------------------------------------------------------------------------------------------------------------------------------------------------------------------------------------------------------------------------------------------------------------------------------------------------------------------------------------------------------------------------------------------------------------------------------------------------------------------------------------------------------------------------------------------------------------------------------------------------------------------------------|
|         | <p>"halogenated diphenyl ethers"[MeSH Terms] OR (Tetrabromodiphenyl[All Fields] AND ("oxides"[MeSH Terms] OR "oxides"[All Fields] OR "oxide"[All Fields])) OR "2,2',4,5'-Tetrabromodiphenyl ether" OR "pentabromodiphenyl ether"[All Fields] OR "2,2',4,4',5-Pentabromodiphenyl ether" OR "2,2',4,4',6-Pentabromodiphenyl ether" OR "PBDE"[All Fields] OR "Toxaphene"[MeSH Terms] OR "toxaphene"[All Fields] OR "polychlorocamphene"[All Fields] OR "Dichloro-diphenyl-trichloroethane"[All Fields] OR "DDT"[All Fields] OR "DDT"[MeSH] OR "methoxychlor"[All Fields] OR "Hexachlorobutadiene"[All Fields] OR "HCBD"[All Fields] OR "hexachloro-1,3-butadiene"[All Fields] OR "hexachlorobuta-1,3-diene"[All Fields] OR "Hexachlorobutadiene"[All Fields] OR "Pentachlorobenzene"[Supplementary Concept] OR "pentachlorobenzene"[All Fields] OR "1,2,3,4,5-Pentachlorobenzene"[All Fields] OR "PeCB"[All Fields] OR "Pentachlorobenzol"[All Fields] OR (Polychlorinated[All Fields] AND dibenzo[All Fields] AND ("dioxins"[MeSH Terms] OR "dioxins"[All Fields])) OR "Dioxins and Dioxin-like Compounds"[MeSH] OR "Dibenzofurans, Polychlorinated"[MeSH] OR "Dioxins"[MeSH] OR TCDD[All Fields] OR "Polychlorinated Dibenzodioxins"[MeSH] OR "2,3,7,8-Tetrachlorodibenzo-p-dioxin"[All Fields] OR "Chlorinated Dibenzo-p-dioxins"[All Fields] OR "PCDD"[All Fields] OR "TCDD"[All Fields] OR "Tetrachlorodibenzodioxin"[All Fields] OR "Polychlorinated Biphenyls"[MeSH] OR "Polychlorinated Biphenyls"[All Fields] OR "Aroclors"[MeSH] OR "Aroclor"[All Fields] OR "Polychlorinated Biphenyl" OR "Dibenzofurans, Polychlorinated"[MeSH] OR "dibenzofurans"[All Fields] OR "polychlorinated dibenzofurans"[All Fields] OR ("polychlorinated"[All Fields] AND "dibenzofurans"[All Fields]) OR "Chlorodibenzofurans"[All Fields] OR pesticide* OR pesticides[Pharmacological Action] OR "pesticides"[MeSH Terms] OR pesticid*[All Fields] OR insecticide* OR insecticides[Pharmacological Action] OR "insecticides"[MeSH Terms] OR insecticid*[All Fields] OR "persistent organic pollutant" OR organochlor*[All Fields] OR polychlorinated[All Fields] OR "Hydrocarbons, Chlorinated"[Mesh] OR "Hydrocarbons, Halogenated"[Mesh])</p> |
| Outcome | (endomet* OR Endometriosis[MeSH] OR endometriosis [tiab] or endometriosis [All fields] OR endometriotic [tiab] OR endometrial[All fields] )                                                                                                                                                                                                                                                                                                                                                                                                                                                                                                                                                                                                                                                                                                                                                                                                                                                                                                                                                                                                                                                                                                                                                                                                                                                                                                                                                                                                                                                                                                                                                                                                                                                                                                                                                                                                                                                                                                                                                                                                                                                                                          |

Note: Exposure block was connected to outcome block with boolean operator "AND". Abbreviations: Medical Subject Headings (MeSH), title and abstract (tiab). Syntax was adapted for each of the other databases.

**Table S2.** List of all organochlorine chemicals identified as Persistent Organic Pollutants listed in the Stockholm Convention (UNEP 2017)

| Nr | Annex          | Name                                                                           | Type                           | OCC |
|----|----------------|--------------------------------------------------------------------------------|--------------------------------|-----|
| 1  | A <sup>a</sup> | Aldrin                                                                         | Pesticide                      | Y   |
| 2  | A              | Chlordane                                                                      | Pesticide                      | Y   |
| 3  | A              | Chlordecone                                                                    | Pesticide                      | Y   |
| 4  | A              | Decabromodiphenyl ether (commercial mixture, c-decaBDE)                        | Industrial chemical            | N   |
| 5  | A              | Difocal                                                                        | Pesticide                      | Y   |
| 6  | A              | Dieldrin                                                                       | Pesticide                      | Y   |
| 7  | A              | Endrin                                                                         | Pesticide                      | Y   |
| 8  | A              | Heptachlor                                                                     | Pesticide                      | Y   |
| 9  | A              | Hexabromobiphenyl                                                              | Industrial chemical            | N   |
| 10 | A              | Hexabromocyclododecane (HBCDD)                                                 | Industrial chemical            | N   |
| 11 | A              | Hexabromodiphenyl ether and heptabromodiphenyl ether                           | Industrial chemical            | N   |
| 12 | A              | Hexachlorobenzene (HCB)                                                        | Pesticide, Industrial chemical | Y   |
| 13 | A              | Hexachlorobutadiene                                                            | Industrial chemical            | Y   |
| 14 | A              | Alpha hexachlorocyclohexane                                                    | Pesticide                      | Y   |
| 15 | A              | Beta hexachlorocyclohexane                                                     | Pesticide                      | Y   |
| 16 | A              | Lindane                                                                        | Pesticide                      | Y   |
| 17 | A              | Mirex                                                                          | Pesticide                      | Y   |
| 18 | A              | Pentachlorobenzene                                                             | Pesticide, Industrial chemical | Y   |
| 19 | A              | Pentachlorophenol and its salts and esters                                     | Pesticide                      | Y   |
| 20 | A              | Perfluorooctanoic acid (PFOA), its salts and PFOA-related compounds            | Industrial Chemical            | N   |
| 21 | A              | Polychlorinated biphenyls (PCB)                                                | Industrial chemical            | Y   |
| 22 | A              | Polychlorinated naphthalenes                                                   | Industrial chemical            | Y   |
| 23 | A              | Short-chain chlorinated paraffins (SCCPs)                                      | Industrial chemical            | Y   |
| 24 | A              | Technical endosulfan and its related isomers                                   | Pesticide                      | Y   |
| 25 | A              | Tetrabromodiphenyl ether and pentabromodiphenyl ether                          | Industrial chemical            | N   |
| 26 | A              | Toxaphene                                                                      | Pesticide                      | Y   |
| 27 | B <sup>b</sup> | DDT                                                                            | Pesticide                      | Y   |
| 28 | B              | Perfluorooctane sulfonic acid, its salts and perfluorooctane sulfonyl fluoride | Pesticide, Industrial chemical | N   |
| 29 | C <sup>c</sup> | Hexachlorobenzene (HCB)                                                        | Unintentional Production       | Y   |
| 30 | C              | Hexachlorobutadiene (HCBD)                                                     | Unintentional Production       | Y   |
| 31 | C              | Pentachlorobenzene                                                             | Unintentional Production       | Y   |
| 32 | C              | Polychlorinated biphenyls (PCB)                                                | Unintentional Production       | Y   |
| 33 | C              | Polychlorinated dibenzo-p-dioxins (PCDD)                                       | Unintentional Production       | Y   |
| 34 | C              | Polychlorinated dibenzofurans (PCDF)                                           | Unintentional Production       | Y   |
| 35 | C              | Polychlorinated naphthalenes                                                   | Unintentional Production       | Y   |

<sup>a</sup>Annex A – “Parties must take measures to eliminate the production and use of [these] chemicals”

<sup>b</sup>Annex B – “Parties must take measures to restrict the production and use of [these] chemicals”

<sup>c</sup>Annex C – “Parties must take measures to reduce the unintentional releases of [these] chemicals...with the goal of continuing minimization and, where feasible, ultimate elimination”

**Table S3.** Data extraction items.

| <b>Study Identification Information</b> |                                        |                            |
|-----------------------------------------|----------------------------------------|----------------------------|
| Study Identification                    | COI Reported                           | Author Contact Information |
| Study URL                               | COI Details                            | Author Contacted           |
| Short Citation                          | Funding Source                         | Study Summary              |
| Full Citation                           | Study Type (Animal Bioassay, In Vitro) |                            |
| <b>In Vivo</b>                          |                                        |                            |
| <b>Animal Group Information</b>         |                                        |                            |
| Experiment Identification               | Chemical Source                        | Diet                       |
| Experiment Name                         | Purity Available/Qualifier             | Litter Effects             |
| Experiment Type                         | Purity                                 | Guidance Compliance        |
| Chemical Name/CAS                       | Vehicle                                | Experiment Description     |
| Animal Group Species                    | Animal Group Strain                    | Animal Source              |
| Life Stage Exposed                      | Life Stage Assessed                    | Observation Duration       |
| <b>Dosing Regime Information</b>        |                                        |                            |
| Dosing Regime Identification            | Duration of Exposure                   | Positive Control           |
| Dosed Animal Group                      | Duration of Exposure Description       | Negative Control           |
| Route of Exposure                       | Number of Dose Groups                  | Dosing Regime Description  |
| <b>Endpoint Information</b>             |                                        |                            |
| Endpoint Identification                 | Confidence Interval                    | Additional Endpoint Fields |
| Endpoint Name                           | Data Reported                          | Dose Units                 |
| System                                  | Data Extracted                         | Dose Group                 |
| Organ                                   | Values Estimated                       | Sample Size (N)            |
| Effect                                  | Expected Adversity Direction           | Incidence                  |
| Effect Subtype                          | Monotonicity                           | Response                   |
| Observation Time                        | Statistical Test                       | Variance                   |
| Observation Time Units                  | Trend Value                            | Lower CI                   |
| Observation Time Description            | Trend Result                           | Upper CI                   |
| Data Location in Text                   | Diagnostic for Determination           | Significance               |
| Response Units                          | Power Notes                            | Significance Level         |
| Data Type (Continuous, Dichotomous)     | Results Notes                          | NOEL/LOEL/FEL              |
| Variance Type (SE, SD)                  | Endpoint Notes                         |                            |
| <b>In Vitro</b>                         |                                        |                            |
| Chemical Identification                 | Dose Units                             | NOEL/LOEL                  |
| Chemical Name                           | Metabolic Activation                   | Monotonicity               |
| CAS                                     | Transfection                           | Overall Pattern            |
| Chemical Purity                         | Endpoint Identification                | Trend Test Result          |
| Experiment Identification               | Endpoint Name                          | Minimum Dose               |
| Cell Origin Species                     | Endpoint Description                   | Maximum Dose               |
| Cell Origin Strain                      | Assay Type                             | Number of Doses            |
| Cell Origin Sex                         | Response Units                         | Change from Control        |
| Cell Type                               | Observation Time                       | Significance (P < 0.05)    |
| Cell Tissue                             | Observation Time Units                 | Cytotoxicity               |

Note: Abbreviations in order of appearance: Conflict of Interest (COI), Chemical Abstracts Service (CAS), Confidence Interval (CI), No Observed Effect Level (NOEL), Lowest Observed Effect Level (LOEL), Frank Effect Level (FEL), Standard Error (SE), Standard Deviation (SD)

**Table S4.** Summary of confidence rating procedure (OHAT, 2015).

| Initial Confidence by Key Features* of Study Design | Factors Decreasing Confidence                                                                                                                                                    | Factors Increasing Confidence                                                                                                                                                                                                                                                                                             | Confidence in the Body of Evidence |
|-----------------------------------------------------|----------------------------------------------------------------------------------------------------------------------------------------------------------------------------------|---------------------------------------------------------------------------------------------------------------------------------------------------------------------------------------------------------------------------------------------------------------------------------------------------------------------------|------------------------------------|
| High (++++) – 4 features                            | <ul style="list-style-type: none"> <li>• Risk of Bias</li> <li>• Unexplained Inconsistency</li> <li>• Indirectness</li> <li>• Imprecision</li> <li>• Publication Bias</li> </ul> | <ul style="list-style-type: none"> <li>• Large Magnitude of Effect</li> <li>• Dose Response</li> <li>• Consistency                             <ul style="list-style-type: none"> <li>–across animal models or species</li> <li>–across dissimilar populations</li> <li>–across study design types</li> </ul> </li> </ul> | High (++++)                        |
| Moderate (+++) – 3 features                         |                                                                                                                                                                                  |                                                                                                                                                                                                                                                                                                                           | Moderate (+++)                     |
| Low (++) – 2 features                               |                                                                                                                                                                                  |                                                                                                                                                                                                                                                                                                                           | Low (++)                           |
| Very Low (+) – ≤1 feature                           |                                                                                                                                                                                  |                                                                                                                                                                                                                                                                                                                           | Very Low (+)                       |

\*Features: (1) controlled exposure, (2) exposure prior to outcome, (3) individual outcome data, and (4) use of comparison group

Note: Adapted from Figure 6 in the Handbook for Conducting a Literature-Based Health Assessment Using OHAT Approach for Systematic Review and Evidence Integration, by NTP/OHAT, 9 Jan 2015. Retrieved from. [https://ntp.niehs.nih.gov/ntp/ohat/pubs/handbookjan2015\\_508.pdf](https://ntp.niehs.nih.gov/ntp/ohat/pubs/handbookjan2015_508.pdf).



**Table S5.** Determination of initial confidence rating based on confidence features of study design.

| <b>Study Design</b>              | <b>Controlled Exposure</b> | <b>Exposure Prior to Outcome</b> | <b>Individual Outcome Data</b> | <b>Comparison Group Used</b> | <b>Initial Confidence Rating</b> |
|----------------------------------|----------------------------|----------------------------------|--------------------------------|------------------------------|----------------------------------|
| <b>Experimental Animal Study</b> | likely                     | likely                           | likely                         | likely                       | <b>HIGH</b>                      |
| <b>In vitro</b>                  | likely                     | likely                           | likely                         | likely                       | <b>HIGH</b>                      |

Note: Adapted from Table 8 in the Handbook for Conducting a Literature-Based Health Assessment Using OHAT Approach for Systematic Review and Evidence Integration, by NTP/OHAT, 9 Jan 2015. Retrieved from.

[https://ntp.niehs.nih.gov/ntp/ohat/pubs/handbookjan2015\\_508.pdf](https://ntp.niehs.nih.gov/ntp/ohat/pubs/handbookjan2015_508.pdf).

**Table S6.** Translation of confidence rating into level of evidence

| Confidence in the Body of Evidence | Direction of the effect | Level of Evidence for the Health Effect |
|------------------------------------|-------------------------|-----------------------------------------|
| Health Effect                      |                         |                                         |
| High                               | ⇒                       | High                                    |
| Moderate                           | ⇒                       | Moderate                                |
| Low                                | ⇒                       | Low                                     |
| Very low or no evidence            | ⇒                       | Inadequate                              |
| No Health Effect                   |                         |                                         |
| High                               | ⇒                       | Evidence of no health effect            |
| Moderate                           | ⇒                       | Inadequate                              |
| Low                                | ⇒                       | Inadequate                              |
| Very low or no evidence            | ⇒                       | Inadequate                              |

Note: Adapted from Figure 7 in the Handbook for Conducting a Literature-Based Health Assessment Using OHAT Approach for Systematic Review and Evidence Integration, by NTP/OHAT, 9 Jan 2015. Retrieved from. [https://ntp.niehs.nih.gov/ntp/ohat/pubs/handbookjan2015\\_508.pdf](https://ntp.niehs.nih.gov/ntp/ohat/pubs/handbookjan2015_508.pdf).

- **High level of evidence.** There is high confidence in the body of evidence for an association between exposure to the substance and the health outcome(s)
- **Moderate level of evidence.** There is moderate confidence in the body of evidence for an association between exposure to the substance and the health outcome(s).
- **Low level of evidence.** There is low confidence in the body of evidence for an association between exposure to the substance and the health outcome(s), or no data are available.
- **Evidence of no health effect.** There is high confidence in the body of evidence that exposure to the substance is not associated with the health outcome(s).
- **Inadequate evidence.** There is insufficient evidence available to assess if the exposure to the substance is associated with the health outcome(s).

**Table S7.** Inventory of chemicals studied in *in vivo* and *in vitro* studies and the number of experiments studying each chemical.

| Chemical                                        | Abbreviation | <i>In vivo</i> | <i>In vitro</i> |
|-------------------------------------------------|--------------|----------------|-----------------|
| 2,3,7,8-Tetrachlorodibenzo-p-dioxin             | TCDD         | 11             | 16              |
| 1,3,6,8-tetrachlorodibenzo-p-dioxin             | 1,3,6,8-TCDD | 1              | 0               |
| 2,3,4,7,8-pentachlorodibenzofuran               | 4-PeCDF      | 1              | 0               |
| 3,3',4,4'-tetrachlorobiphenyl                   | PCB 77       | 0              | 1               |
| 2,2',4,6,6'-Pentachlorobiphenyl                 | PCB 104      | 0              | 1               |
| 3,3',4,4',5-pentachlorobiphenyl                 | PCB 126      | 2              | 3               |
| 2,2',4,4',5,5'-Hexachlorobiphenyl               | PCB 153      | 2              | 2               |
| 2,2-dichlorodiphenyl-1,1,1-trichloroethane      | p,p'-DDT     | 0              | 1               |
| 2,2-bis(p-chlorophenyl)ethylene                 | p,p'-DDE     | 0              | 1               |
| 2,2-Bis(o,p-chlorophenyl)-1,1,1-trichloroethane | o,p'-DDT     | 0              | 2               |
| Hexachlorobenzene                               | HCB          | 1              | 1               |
| 4-Chlorodiphenylether                           | 4-CDE        | 2              | 0               |
| Atrazine                                        | ATR          | 0              | 1               |
| Methoxychlor                                    | MXC          | 1              | 0               |

**Table S8.** Inventory of cell types of *in vitro* studies and the number of experiments using each cell type.

| <b>Cell Type</b>                      | <b>Count</b> | <b>Total</b> |
|---------------------------------------|--------------|--------------|
| Endometrial Stromal Cells (ESCs)      |              | 16           |
| unspecified                           | 6            |              |
| eutopic                               | 6            |              |
| ectopic                               | 2            |              |
| immortalised                          | 2            |              |
| ESC co-cultures                       |              | 10           |
| U937-ESC-HMPC Co-culture              | 4            |              |
| U937-ESC Co-culture                   | 2            |              |
| ESC-HMPC Co-culture                   | 1            |              |
| ESC-EEC Co-culture                    | 2            |              |
| ESC-monocyte Co-culture               | 1            |              |
| Endometrial Epithelial Cells (EECs)   |              | 1            |
| immortalised                          | 1            |              |
| Endometrial Endothelial Cells (EEnCs) |              | 2            |
| unspecified                           | 2            |              |
| Tissues                               |              | 3            |
| Endometrial Explant                   | 2            |              |
| Uterine Fibroblasts                   | 1            |              |
| Other                                 |              | 1            |
| Granulosa Cells                       | 1            |              |

Note: Study experiments may contain more than one type of cell.

## 2. SECTION 2: FIGURES

### 2.1 METHODS: DATA EXTRACTION PROCESS EXAMPLES

#### Foster et al. 1997

Actions ▾

|                        |                                                                                                                                                                                                                                                                                                                                                                                                                                                                                                                                                                                                                                                                                                                                                                                                                                                                                                                                                                                                                                                                                                                                                                                                                                                                                                                                                                                                                                                                                                                                                                                                                                                                                                                                                                                                                                                                                          |
|------------------------|------------------------------------------------------------------------------------------------------------------------------------------------------------------------------------------------------------------------------------------------------------------------------------------------------------------------------------------------------------------------------------------------------------------------------------------------------------------------------------------------------------------------------------------------------------------------------------------------------------------------------------------------------------------------------------------------------------------------------------------------------------------------------------------------------------------------------------------------------------------------------------------------------------------------------------------------------------------------------------------------------------------------------------------------------------------------------------------------------------------------------------------------------------------------------------------------------------------------------------------------------------------------------------------------------------------------------------------------------------------------------------------------------------------------------------------------------------------------------------------------------------------------------------------------------------------------------------------------------------------------------------------------------------------------------------------------------------------------------------------------------------------------------------------------------------------------------------------------------------------------------------------|
| Data type(s)           | Animal bioassay                                                                                                                                                                                                                                                                                                                                                                                                                                                                                                                                                                                                                                                                                                                                                                                                                                                                                                                                                                                                                                                                                                                                                                                                                                                                                                                                                                                                                                                                                                                                                                                                                                                                                                                                                                                                                                                                          |
| Full citation          | Foster WG et al. Morphologic characteristics of endometriosis in the mouse model: application to toxicology. Canadian Journal of Physiology and Pharmacology 1997, 75 (10-11):1188-1196.                                                                                                                                                                                                                                                                                                                                                                                                                                                                                                                                                                                                                                                                                                                                                                                                                                                                                                                                                                                                                                                                                                                                                                                                                                                                                                                                                                                                                                                                                                                                                                                                                                                                                                 |
| Abstract               | <p>Surgically induced endometriosis in the mouse has been described as a model to investigate the effect of environmental pollutants on the growth of endometrial implants. The objectives of this study were to evaluate a modified surgical procedure to induce endometriosis and validate the model by comparing the effects of estrogen, 4-chlorodiphenyl ether (4-CDE) as a possible estrogenic contaminant, and 2,3,7,8-tetrachlorodibenzo-p-dioxin (TCDD), a contaminant with predominantly anti-estrogenic activities, on the growth of endometrial implants. Uterine strips (1.0 x 4.0 mm(2)) were autotransplanted to multiple sites in the abdomen of sexually mature female B6C3F1 mice (n = 33), which were randomly assigned to the following groups: intact control (n = 4); ovariectomized (OVX, n = 9); OVX and treated with 4-CDE (n = 6); OVX and treated with 17 beta-estradiol (E-2, n = 9); and OVX and treated with E-2 plus TCDD (n = 5). Endometrial implants survived warm ischemia regardless of implant site and appeared as small clear spherical or ovoid fluid-filled cysts. The diameter of the endometrial cysts in the OVX animals was significantly (p &lt; 0.0001) smaller compared with the intact animals and OVX animals replaced with E-2 or 4-CDE. In contrast, TCDD treatment inhibited the growth of endometrial cysts in the presence of estrogen. We conclude that autotransplantation of uterine slices to multiple abdominal sites results in formation of endometrial cysts that are responsive to estrogen, and that environmental contaminants possess the potential to affect the survival and growth of endometrial cysts. Therefore, we concluded that the mouse endometriosis model described in this paper has applications to investigate the possible role of environmental pollutants in the development of endometriosis.</p> |
| Reference hyperlink    | <ul style="list-style-type: none"><li>• DOI</li></ul>                                                                                                                                                                                                                                                                                                                                                                                                                                                                                                                                                                                                                                                                                                                                                                                                                                                                                                                                                                                                                                                                                                                                                                                                                                                                                                                                                                                                                                                                                                                                                                                                                                                                                                                                                                                                                                    |
| Literature review tags | Animal Study<br>Murine<br>Mouse                                                                                                                                                                                                                                                                                                                                                                                                                                                                                                                                                                                                                                                                                                                                                                                                                                                                                                                                                                                                                                                                                                                                                                                                                                                                                                                                                                                                                                                                                                                                                                                                                                                                                                                                                                                                                                                          |
| COI reported           | Not reported                                                                                                                                                                                                                                                                                                                                                                                                                                                                                                                                                                                                                                                                                                                                                                                                                                                                                                                                                                                                                                                                                                                                                                                                                                                                                                                                                                                                                                                                                                                                                                                                                                                                                                                                                                                                                                                                             |
| Funding source         | Not reported                                                                                                                                                                                                                                                                                                                                                                                                                                                                                                                                                                                                                                                                                                                                                                                                                                                                                                                                                                                                                                                                                                                                                                                                                                                                                                                                                                                                                                                                                                                                                                                                                                                                                                                                                                                                                                                                             |
| Author contacted?      | ✓                                                                                                                                                                                                                                                                                                                                                                                                                                                                                                                                                                                                                                                                                                                                                                                                                                                                                                                                                                                                                                                                                                                                                                                                                                                                                                                                                                                                                                                                                                                                                                                                                                                                                                                                                                                                                                                                                        |

Figure S1. Example of general study data form in HAWC .

## Available animal bioassay experiments

| Name                                             | Type                   | Comments                                                                                                                                                                                                                                                               |
|--------------------------------------------------|------------------------|------------------------------------------------------------------------------------------------------------------------------------------------------------------------------------------------------------------------------------------------------------------------|
| <a href="#">4-CDE 30-day mouse endometriosis</a> | Short-term (1-30 days) | Animals were housed in polycarbonate cages in rooms maintained at $22 \pm 2^\circ\text{C}$ and between 30 and 50% relative humidity. Lights were on from 07:00 to 19:00.<br><br>Free access to food (Purina mouse chow) and water was maintained throughout the study. |
| <a href="#">TCDD 30-day mouse endometriosis</a>  | Short-term (1-30 days) | Animals were housed in polycarbonate cages in rooms maintained at $22 \pm 2^\circ\text{C}$ and between 30 and 50% relative humidity. Lights were on from 07:00 to 19:00.<br><br>Free access to food (Purina mouse chow) and water was maintained throughout the study. |

**Figure S2.** Example of animal bioassay (*in vivo*) experiment(s) form in HAWC.

## TCDD 30-day mouse endometriosis

[Actions](#)

|                                  |                                                                                                                                                                                                                                                 |
|----------------------------------|-------------------------------------------------------------------------------------------------------------------------------------------------------------------------------------------------------------------------------------------------|
| Name                             | TCDD 30-day mouse endometriosis                                                                                                                                                                                                                 |
| Type                             | Short-term (1-30 days)                                                                                                                                                                                                                          |
| Multiple generations             | No                                                                                                                                                                                                                                              |
| Chemical                         | TCDD                                                                                                                                                                                                                                            |
| CAS                              | 1746-01-6                                                                                                                                                                                                                                       |
| DTXSID                           | <a href="#">DTXSID2021315</a> : 2,3,7,8-Tetrachlorodibenzo-p-dioxin (CASRN 1746-01-6)                                                                                                                                                           |
| Chemical source                  | AccuStandard                                                                                                                                                                                                                                    |
| Chemical purity                  | >99%                                                                                                                                                                                                                                            |
| Guideline compliance             | Canadian Council on Animal Care guidelines                                                                                                                                                                                                      |
| Description and animal husbandry | Animals were housed in polycarbonate cages in rooms maintained at 22 ± 2°C and between 30 and 50% relative humidity. Lights were on from 07:00 to 19:00. Free access to food (Purina mouse chow) and water was maintained throughout the study. |

### Substance information

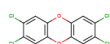

|                  |                                                        |
|------------------|--------------------------------------------------------|
| Common name      | 2,3,7,8-Tetrachlorodibenzo-p-dioxin                    |
| DTXSID           | <a href="#">DTXSID2021315</a>                          |
| CASRN            | 1746-01-6                                              |
| SMILES           | <chem>C1C=CC2=C(OC3=C(O2)C=C(C1)C(Cl)=C3)C=C1Cl</chem> |
| Molecular weight | 321.96                                                 |

Chemical information provided by [USEPA Chemicals Dashboard](#)

### Available animal groups

| Name                               | Species | Strain | Sex    | Siblings |
|------------------------------------|---------|--------|--------|----------|
| <a href="#">Female B6C3F1 Mice</a> | Mouse   | B6C3F1 | Female | None     |

**Figure S3.** Example of animal bioassay (*in vivo*) experiment data form in HAWC.

## Female B6C3F1 Mice

[Actions](#)

|                    |                                           |
|--------------------|-------------------------------------------|
| Name               | Female B6C3F1 Mice                        |
| Species            | Mouse                                     |
| Strain             | B6C3F1                                    |
| Sex                | Female                                    |
| Source             | commercial breeder                        |
| Lifestage exposed  | adult                                     |
| Lifestage assessed | adult                                     |
| Diet               | Purina mouse chow and water (free access) |

### Dosing regime

|                       |                              |
|-----------------------|------------------------------|
| Route of exposure     | Subcutaneous injection       |
| Exposure duration     | daily injection, for 30 days |
| Duration observation  | 30 days                      |
| Number of dose-groups | 2                            |
| Positive control      | No                           |
| Negative control      | Vehicle-treated              |
| Doses                 | <b>µg/kg-day</b>             |
|                       | 0                            |
|                       | 0.1                          |

#### Description

**Treatment:** OVX and treated with E2 plus TCDD at a dose of 100 ng/kg/day (n = 5).

**Negative control:** OVX and treated with 17 $\beta$ -estradiol via silastic capsule implanted subcutaneously

### Available endpoints

| Endpoint                                    | Organ       | Obs. time | Groups µg/kg-day |                                  |
|---------------------------------------------|-------------|-----------|------------------|----------------------------------|
|                                             |             |           | 0                | 0.1                              |
| Sample Size                                 | -           | -         | 8                | 5                                |
| <a href="#">Endometriotic Site Diameter</a> | Endometrium | -         | 3.52 ± 0.339     | 1.87 ± 0.045 (-47%) <sup>*</sup> |

\* Significantly different from control ( $p < 0.05$ )

**Figure S4.** Example of animal bioassay (*in vivo*) group data form in HAWC.



# Endometriotic Site Diameter

Actions

## Endpoint Details

|                              |                                                                                                                                                                                                      |
|------------------------------|------------------------------------------------------------------------------------------------------------------------------------------------------------------------------------------------------|
| Endpoint name                | Endometriotic Site Diameter                                                                                                                                                                          |
| System                       | Reproductive                                                                                                                                                                                         |
| Organ                        | Endometrium                                                                                                                                                                                          |
| Effect                       | Size of endometriotic implant                                                                                                                                                                        |
| Effect subtype               | Lesion Diameter                                                                                                                                                                                      |
| Diagnostic description       | necropsy                                                                                                                                                                                             |
| Data reported?               | ✓                                                                                                                                                                                                    |
| Data extracted?              | ✓                                                                                                                                                                                                    |
| Values estimated?            | ✓                                                                                                                                                                                                    |
| Location in literature       | Figure 3                                                                                                                                                                                             |
| Monotonicity                 | N/A, single dose level study                                                                                                                                                                         |
| Statistical test description | 1-way ANOVA                                                                                                                                                                                          |
| Trend result                 | not reported                                                                                                                                                                                         |
| Results notes                | E2, 3,52 (E2 UL; 3,64)<br>TCDD, 1,87 (TCDD UL; 1,89)<br>E2 is control with estradiol<br>"TCDD treatment significantly suppressed the stimulating effects of E2 on the growth of endometrial lesions" |

## Dataset

| Dose (µg/kg-day) | Number of Animals | Response (mm) | Standard Error |
|------------------|-------------------|---------------|----------------|
| 0                | 8                 | 3.52          | 0.12           |
| 0.1 <sup>a</sup> | 5                 | 1.87          | 0.02           |

<sup>a</sup> Significantly different from control (p < 0.05)

## Plot

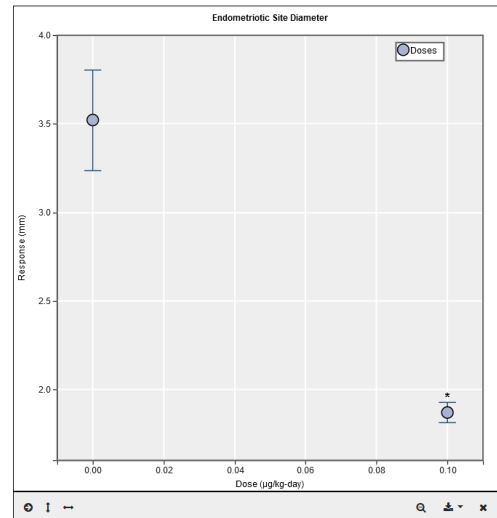

### Methodology

Compared to OVX no treatment, TCDD treated mice had larger lesions.

But compared to OVX+Estradiol treatment, TCDD suppressed estrogenic activities

Figure S5. Example of dose-response endpoint visualisation in HAWC

## 2.2 METHODS: HAZARD IDENTIFICATION

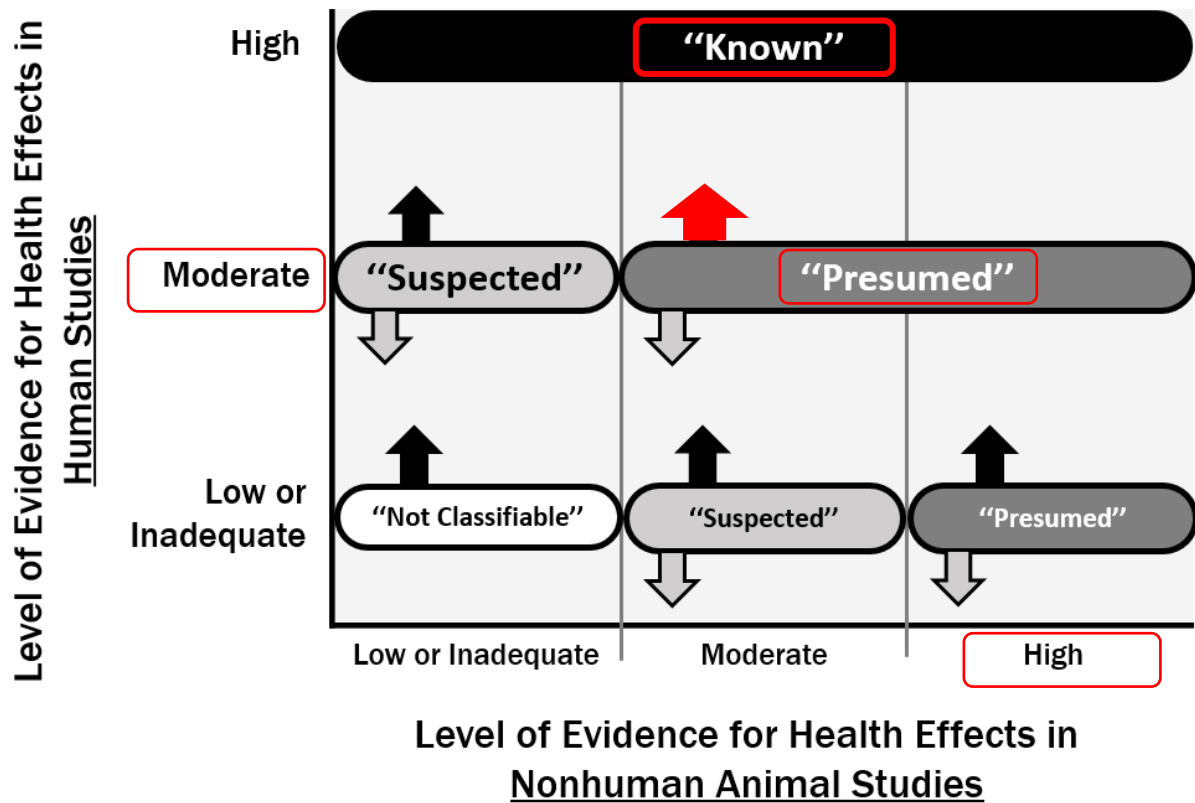

**Figure S6.** Hazard Identification Scheme.

Note: Reprinted from Figure 8 in the Handbook for Conducting a Literature-Based Health Assessment Using OHAT Approach for Systematic Review and Evidence Integration, by NTP/OHAT, 9 Jan 2015. Retrieved from. [https://ntp.niehs.nih.gov/ntp/ohat/pubs/handbookjan2015\\_508.pdf](https://ntp.niehs.nih.gov/ntp/ohat/pubs/handbookjan2015_508.pdf).

## 2.3 RESULTS: RISK OF BIAS

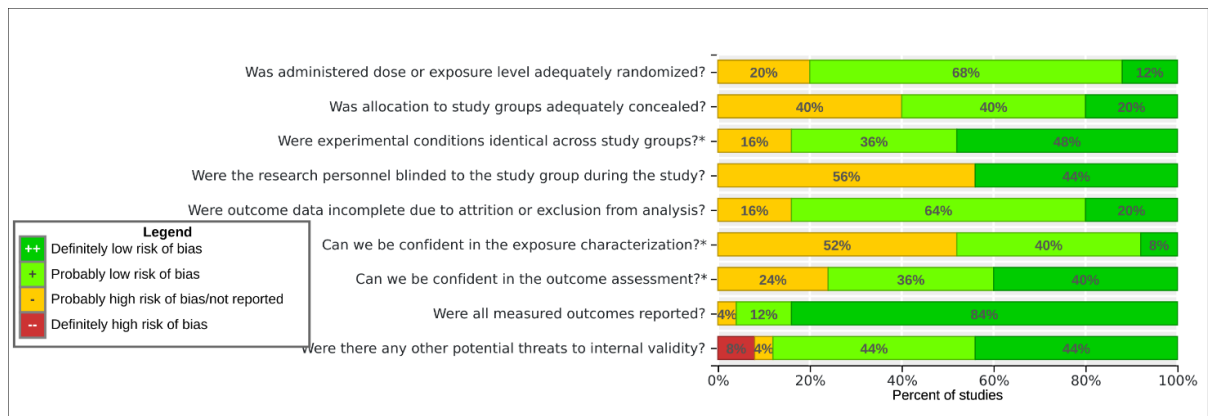

**Figure S7.** Risk of Bias Assessment of individual studies on all primary endpoints. Ratings are illustrated by percentage (out of 25 total studies; n = 16 for *in vivo* studies, n = 9 for *in vitro* studies). Interactive figure with additional information and justifications in HAWC [Figure S7](#).

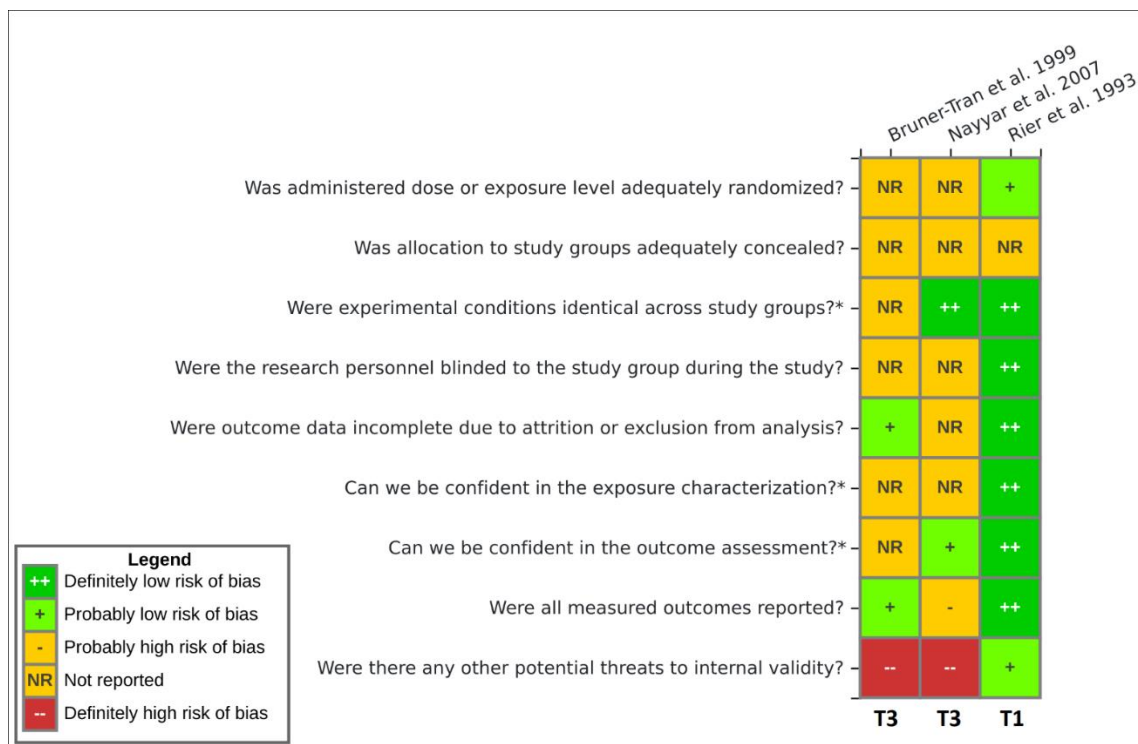

**Figure S8.** Risk of bias (RoB) heatmap for TCDD on *in vivo* onset. Key elements are marked by \*. Tiers 1-3 are tiered rankings as determined by responses to the RoB questions. Tier 1 (T1) study responses are mostly “definitely low” and “probably low”. Tier 3 (T3) responses are mostly “not reported” or “probably high” or “definitely high”. Interactive figure with additional information and justifications in HAWC [Figure S8](#).

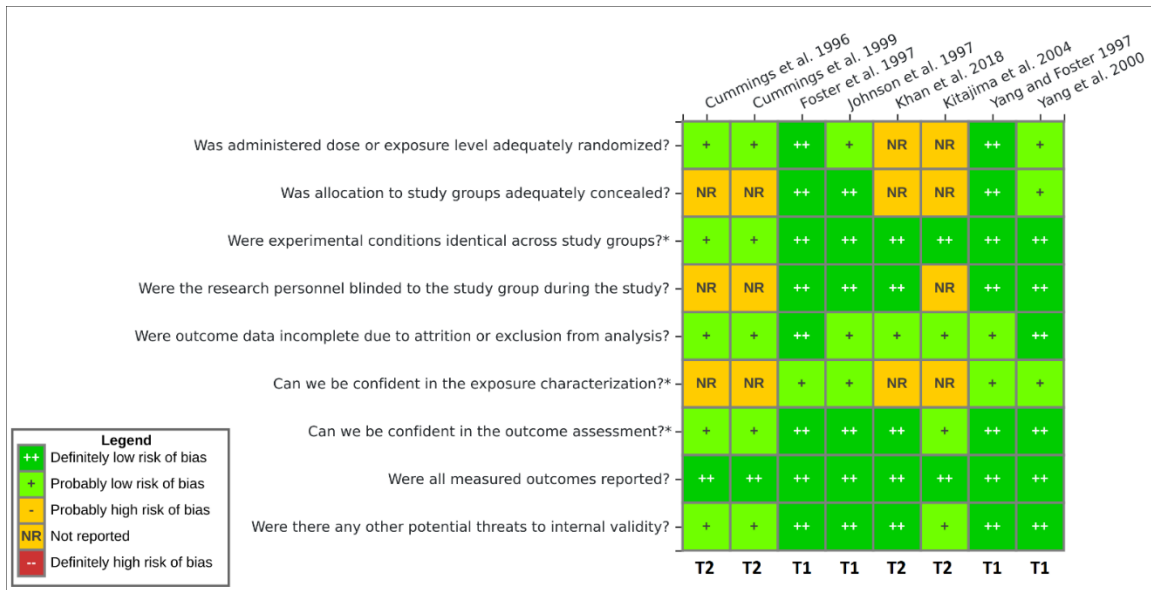

**Figure S9.** Risk of bias (Rob) heatmap for TCDD on *in vivo* lesion growth. Key elements are marked by \*. Tiers 1-2 are tiered rankings as determined by responses to the RoB questions. Tier 1 (T1) study responses are mostly “definitely low” and “probably low”. Tier 2 (T2) responses are mostly “probably low” with some “not reported”. Interactive figure with additional information and justifications in HAWC [Figure S9](#).

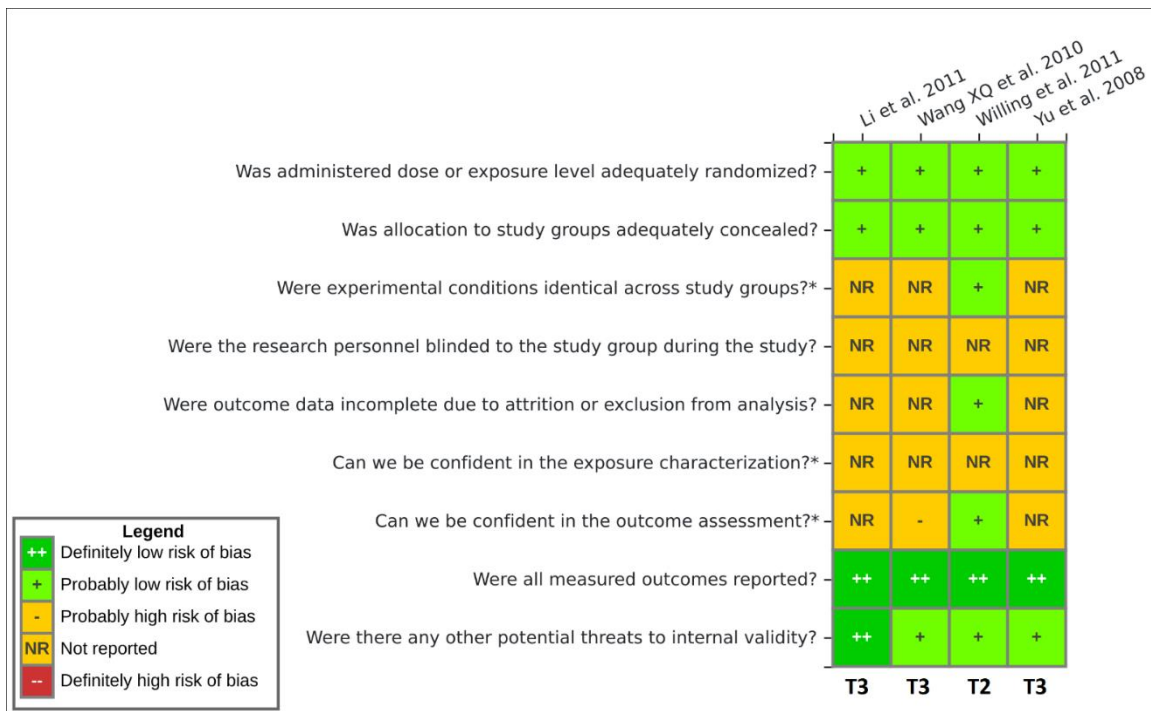

**Figure S10.** Risk of bias (RoB) heatmap for TCDD on *in vitro* migration/invasion. Key elements are marked by \*. Tiers 2-3 are tiered rankings as determined by responses to the RoB questions. Tier 2 (T2) responses are mostly “probably low” with some “not reported”. Tier 3 (T3) responses are mostly “not reported” or “probably high” or “definitely high”. Interactive figure with additional information and justifications in HAWC [Figure S10](#).

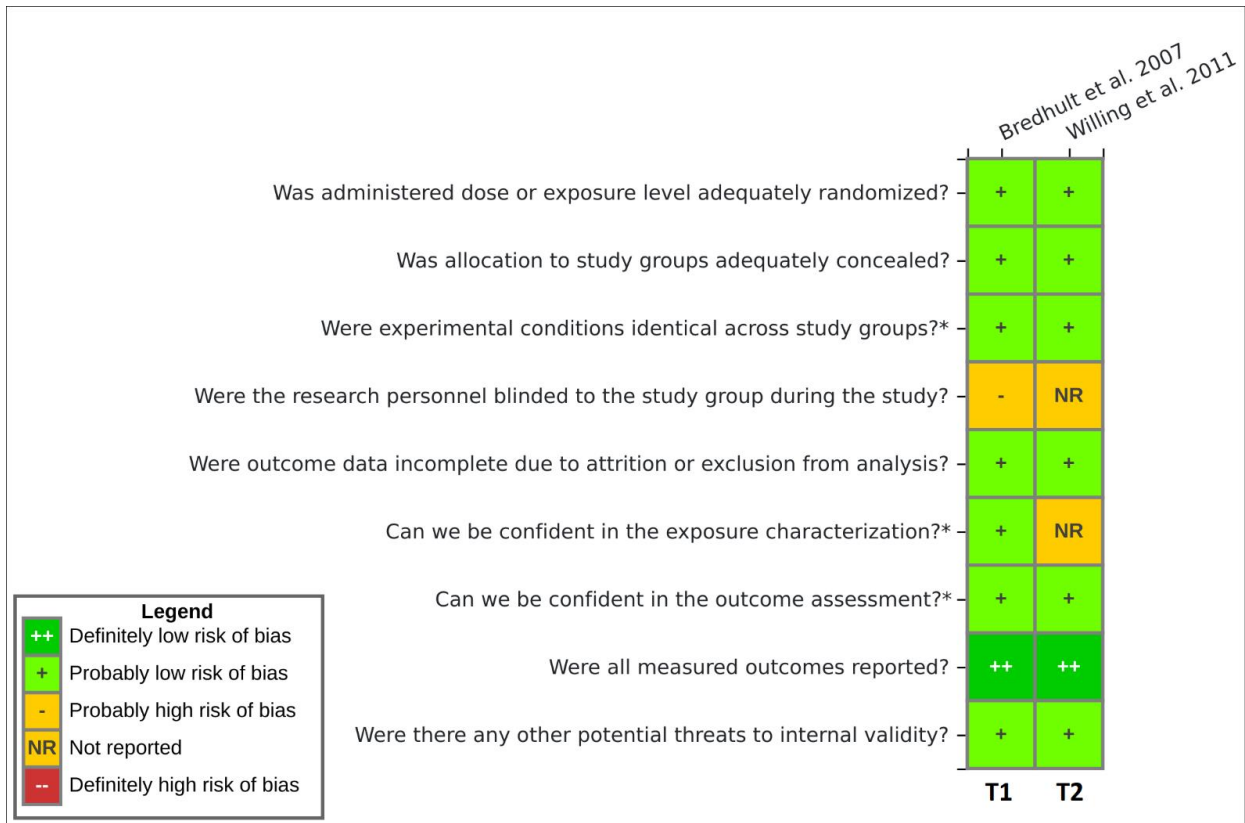

**Figure S11.** Risk of bias (RoB) heatmap for TCDD on *in vitro* viability/proliferation. Key elements are marked by \*. Tiers 1-2 are tiered rankings as determined by responses to the RoB questions. Tier 1 (T1) study responses are mostly “definitely low” and “probably low”. Tier 2 (T2) responses are mostly “probably low” with some “not reported”. Interactive figure with additional information and justifications in HAWC [Figure S11](#).

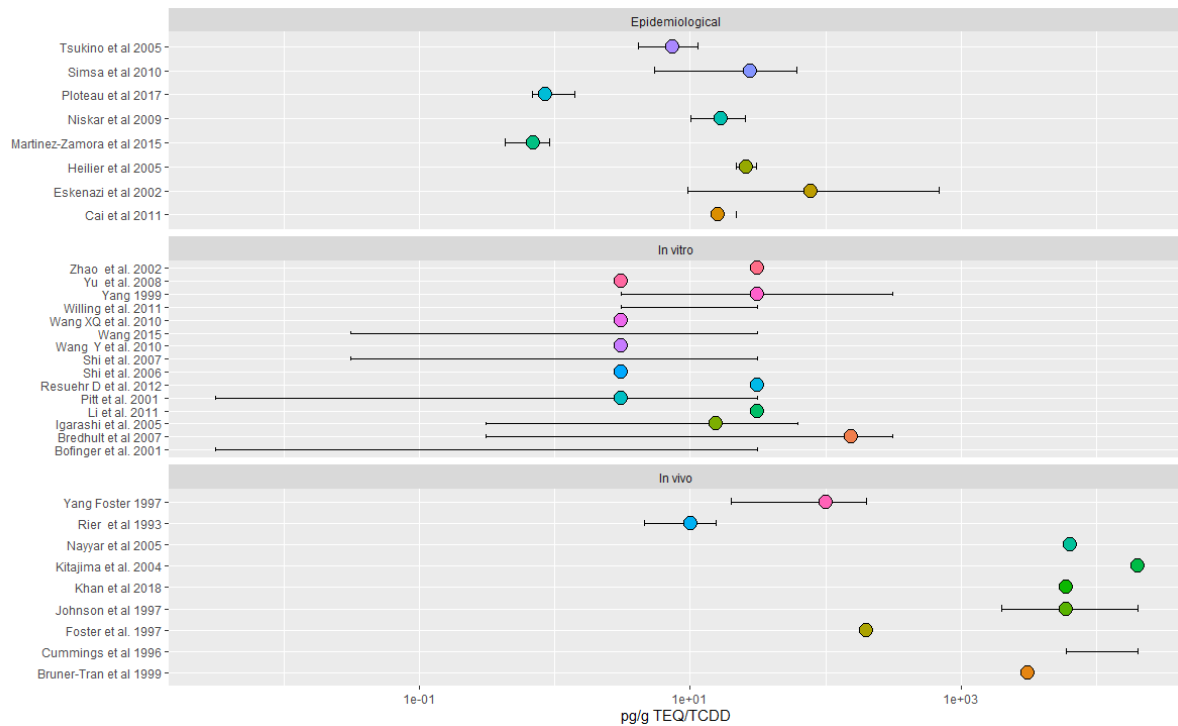

**Figure S12.** Tested doses of TCDD (pg/g TEQ/TCDD) in *in vitro* and *in vivo* studies plotted to compare with measured internal doses from human epidemiological studies.

Note: Epidemiological studies included here were reviewed in Human epidemiological evidence about the associations between exposure to organochlorine chemicals and endometriosis: Systematic review and meta-analysis, by Cano-Sancho et al., 2019, *Environment International*, Vol 123, p. 209-223, <https://doi.org/10.1016/j.envint.2018.11.065>.



### 3. SECTION 3: RISK OF BIAS

#### RISK OF BIAS RESPONSE CRITERIA

The following criteria was used to determine Risk of Bias rating for individual studies, using the NTP/OHAT Risk of Bias Tool (OHAT, 2015b) and the OHAT Evaluation of PFOA or PFOS Exposure Protocol, for *in vitro* studies (NTP 2016):

##### **Q1. Was administered dose or exposure level adequately randomized?**

Randomization of exposure or sequence generation (along with allocation concealment in question #2) helps to assure that treatment is not given selectively based on potential differences in experimental animals. Randomization requires that each subject had an equal chance of being assigned to any study group including controls (e.g., use of random number table or computer generated randomization). This applies to a concurrent negative control group (i.e., a group for which exposure is to vehicle or media alone or un-treated) which must be included in the study to address randomization as well as any positive control group that may be part of the study.

- *Definitely Low risk of bias*: There is direct evidence that animals were allocated to any study group including controls using a method with a random component, AND there is direct evidence that the study used a concurrent control group as an indication that randomization covered all study groups.
  - For *in vitro* studies: OR all cells in culture come from a homogenous cell suspension recently collected from cell culture vessels following appropriate cell culture techniques
- *Probably Low risk of bias*: There is indirect evidence that animals/cells were allocated to any study group including controls using a method with a random component (i.e., authors state that allocation was random, without description of the method used), AND there is direct or indirect evidence that the study used a concurrent control group as an indication that randomization covered all study groups, OR it is deemed that allocation without a clearly random component during the study would not appreciably bias results.
- *Probably High risk of bias*: There is indirect evidence that animals/cells were allocated to study groups using a method with a non-random component, OR there is indirect evidence that there was a lack of a concurrent control group

- *Definitely High risk of bias*: There is direct evidence that animals/cells were allocated to study groups using a non-random method including judgment of the investigator, the results of a laboratory test or a series of tests.
- *Not Reported*: There is insufficient information provided about how subjects were allocated to study groups.

## **Q2. Was allocation to study groups adequately concealed?**

Allocation concealment prior to assigning the exposure level or treatment group (along with randomization in question #1) helps to assure that treatment is not given selectively based on potential differences in experimental animals or cell groups. Allocation concealment requires that research personnel allocating animals or cells to treatment groups (including the control group) could not foresee which administered dose or exposure level is going to be assigned at the start of a study. A lack of allocation concealment can bias results away from the null towards larger effect sizes.

- *Definitely Low risk of bias*: There is direct evidence that at the time of assigning study groups the research personnel did not know what group animals/cells were allocated to, and it is unlikely that they could have broken the blinding of allocation until after assignment was complete and irrevocable.
  - For *in vitro* studies: This may also be the case for *in vitro* studies with very low potential differences between cells that comprise the different groups, e.g., cells pipetted from a homogeneous cell suspension (single or mixed cell types) recently collected from cell culture vessels by accepted methods.
- *Probably Low risk of bias*: There is indirect evidence that at the time of assigning study groups the research personnel did not know what group animals/cells were allocated to and it is unlikely that they could have broken the blinding of allocation until after assignment was complete and irrevocable, OR it is deemed that lack of adequate allocation concealment would not appreciably bias results.
- *Probably High risk of bias*: There is indirect evidence that at the time of assigning study groups it was possible for the research personnel to know what group animals/cells were allocated to, or it is likely that they could have broken the blinding of allocation before assignment was complete and irrevocable.
- *Definitely High risk of bias*: There is direct evidence that at the time of assigning study groups it was possible for the research personnel to know what group animals/cells were allocated to, or it is likely that they could have broken the blinding of allocation before assignment was complete and irrevocable.

- *Not Reported*: There is insufficient information provided about allocation to study groups.

### **Q3. Were experimental conditions identical across study groups?**

Housing conditions and husbandry practices should be identical across control and experimental groups because these variables may impact the outcome of interest (Duke, Zammit, & Lawson, 2001; Gerdin et al., 2012). Identical conditions include use of the same vehicle in control and experimental animals.

- *Definitely Low risk of bias*: There is direct evidence that same vehicle was used in control and experimental animals, AND there is direct evidence that non-treatment-related experimental conditions were identical across study groups (i.e., the study report explicitly provides this level of detail).
  - For *in vitro* studies: Direct evidence that culture conditions included identical concentrations of any solvents (e.g., DMSO) used in getting the treatment compound into solution, AND the same media was used for control and experimental cells particularly for biological materials such as serum which must be from the same lot, AND appropriate adjustments were made such as normalization to blank/media controls, cell numbers in culture, use of positive and negative control responses in acceptance criteria, or others, AND non-treatment-related experimental conditions were identical across study groups (i.e., the study report explicitly provides this level of detail).
- *Probably Low risk of bias*: There is indirect evidence that the same vehicle was used in control and experimental animals/cells, OR it is deemed that the vehicle used would not appreciably bias results AND as described above, identical non-treatment-related experimental conditions are assumed if authors did not report differences in housing or husbandry.
- *Probably High risk of bias*: There is indirect evidence that the vehicle differed between control and experimental animals/cells, OR there is indirect evidence that non-treatment-related experimental conditions were not comparable between study groups.
- *Definitely High risk of bias*: There is direct evidence from the study report that control animals/cells were untreated, or treated with a different vehicle than experimental animals/cells, OR there is direct evidence that non-treatment-related experimental conditions were not comparable between study groups.
- *Not Reported*: Authors did not report the vehicle used

### **Q4. Were the research personnel blinded to the study group during the study?**

Blinding requires that research personnel do not know which administered dose or exposure level the animal subject is being given (i.e., study group). In animal studies, blinding of study group during the course of the study is often not possible for animal welfare considerations and the need to determine if treated animals are affected relative to controls in a treatment or dose-dependent manner (examples include clinical observations and histopathologic assessment of non-neoplastic lesions). Knowledge and tracking of higher exposed animals may also be part of animal welfare practices designed to avoid suffering associated with overtly toxic treatment doses. Under some conditions it is unlikely that blinding of research personnel during the course of a study can be fully achieved. However, animal studies are in general more tightly controlled than human studies and additional measures may be taken to reduce the risk of bias, such as the generation and use of standard operating procedures, training, and randomized husbandry or handling practices (e.g., placement in the animal room, necropsy order, etc.).

- *Definitely Low risk of bias*: There is direct evidence that the research personnel were adequately blinded to study group, and it is unlikely that they could have broken the blinding during the study.
  - For *in vitro* studies: OR the use of robotic testing systems during the study that are deemed to eliminate the opportunity for performance bias to influence results.
- *Probably Low risk of bias*: There is indirect evidence that the research personnel were adequately blinded to study group, and it is unlikely that they could have broken the blinding during the study, OR it is deemed that lack of adequate blinding during the study would not appreciably bias results.
- *Probably High risk of bias*: There is indirect evidence that the research personnel were not adequately blinded to study group.
- *Definitely High risk of bias*: There is direct evidence that the research personnel were not adequately blinded to study group.
- *Not Reported*: There is insufficient information provided about blinding to study group during the study.

**Q5. Were outcome data incomplete due to attrition or exclusion from analysis?**

Attrition or exclusion because of illness, death, or other reasons can introduce bias when missing outcome data are related to both exposure and outcome. Attrition bias can potentially change the collective (group) characteristics of the relevant groups and their observed outcomes in ways that affect study results by confounding and spurious associations (Viswanathan M et al., 2012). Concern over bias from incomplete outcome data is mainly theoretical and most studies that have looked at

whether aspects of missing data are associated with magnitude of effect estimates have not found clear evidence of bias (reviewed in Higgins and Green 2011). In *In vitro* studies, loss of cells due to test chemical toxicity may seriously alter the interpretation of results from specific assays, thus viability assays at same tested doses and incubation condition should be included to rule out unwanted interactions (OECD 2018).

- *Definitely Low risk of bias*: There is direct evidence that loss of animals (or cells, for *in vitro* studies) was adequately addressed and reasons were documented when animals (or wells/plates, for *in vitro* studies) were removed from a study. Acceptable handling of attrition includes: very little missing outcome data; reasons for missing animals/cells unlikely to be related to outcome (or for survival data, censoring unlikely to be introducing bias); missing outcome data balanced in numbers across study groups, with similar reasons for missing data across groups; missing outcomes is not enough to impact the effect estimate, OR missing data have been imputed using appropriate methods (insuring that characteristics of missing individuals are not significantly different from ones retained in the analysis).
- *Probably Low risk of bias*: There is indirect evidence that loss of animals/cells was adequately addressed and reasons were documented when animals/cells were removed from a study, OR it is deemed that the proportion lost would not appreciably bias results. This would include reports of no statistical differences in characteristics of animals/cells removed from the study from those remaining in the study.
- *Probably High risk of bias*: There is indirect evidence that loss of animals/cells was unacceptably large and not adequately addressed.
- *Definitely High risk of bias*: There is direct evidence that loss of animals/cells was unacceptably large and not adequately addressed. Unacceptable handling of attrition or exclusion includes: reason for loss is likely to be related to true outcome, with either imbalance in numbers or reasons for loss across study groups.
- *Not Reported*: There is insufficient information provided about loss of animals/cells.

#### **Q6. Can we be confident in the exposure characterization?**

This considers the accuracy of the exposure characterization, including both purity and stability for controlled exposure studies. The risk of bias associated with exposure to impurities depends on the identity of the impurities and the sensitivity of the outcome of interest which could result in potential effects of those impurities on the outcome of interest.

- *Definitely Low risk of bias*: There is direct evidence that the exposure (including purity and stability of the test substance and compliance with the treatment, if applicable) was independently characterized and purity confirmed generally as  $\geq 99\%$  for single substance or non-mixture evaluations, AND that exposure was consistently administered (i.e., with the same method and time-frame) across treatment groups.
- *Probably Low risk of bias*: There is indirect evidence that the exposure (including purity and stability of the test substance and compliance with the treatment, if applicable) was independently characterized and purity confirmed generally as  $\geq 99\%$  (i.e., the supplier of the chemical provides documentation of the purity of the chemical), OR direct evidence that purity was independently confirmed as  $\geq 98\%$  it is deemed that impurities of up to 2% would not appreciably bias results, AND there is indirect evidence that exposure was consistently administered (i.e., with the same method and time-frame) across treatment groups.
- *Probably High risk of bias*: There is indirect evidence that the exposure (including purity and stability of the test substance and compliance with the treatment, if applicable) was assessed using poorly validated methods.
- *Definitely High risk of bias*: There is direct evidence that the exposure (including purity and stability of the test substance and compliance with the treatment, if applicable) was assessed using poorly validated methods.
- *Not Reported*: There is insufficient information provided about the validity of the exposure assessment method, but no evidence for concern.

#### **Q7. Can we be confident in the outcome assessment?**

“Detection bias can be minimized by using valid and reliable methods to assess the outcome applied consistently across groups (i.e., under the same method and time-frame). Objectivity of the outcome assessment and the need for blinding are two sides of the same issue. Blinding requires that outcome assessors do not know the study group or exposure level of the animal when the outcome was assessed. The objectivity of procedures used for measuring and reporting an outcome will impact the degree to which outcome assessors could bias the reported results.”

In most animal species, endometriosis cannot spontaneously occur, so endometriotic lesions must be induced by surgical implantation of autologous endometriotic tissues into the animals' uterus (Vernon and Wilson 1985) for rats and (Cummings and Metcalf 1995a) for mice. Lesions are counted and measured at least twice (upon induction and after treatment) to determine lesion survival and changes in size. Despite it being previously shown that measurement from a single dimension (i.e. diameter in

mm) is sufficient to determine growth of endometriotic sites (Vernon and Wilson 1985), some studies have measured lesion size in either multiple dimensions (i.e. length and width) or by volume or weight.

For *in vitro* studies, well-established methods will depend on the outcome, but examples of such methods may include: objectively measured cell migration, cytokine concentrations with diagnostic methods using commercial kits, commercial laboratories with experience in the assay, or standard assays such as ELISAs for IgG and with sufficiently low variation and limits of detection to allow discrimination of responses between treatment groups (or direct evidence that the assay could have detected a difference based on responses to a positive control). The OECD Guidance Document on Good In Vitro Method Practices (GIVIMP) may support the identification of standard methods for *in vitro* tests (OECD 2018).

- *Definitely Low risk of bias*: There is direct evidence that the outcome was assessed using well-established methods (the gold standard), AND assessed at the same length of time after initial exposure in all study groups, AND there is direct evidence that the outcome assessors were adequately blinded to the study group, and it is unlikely that they could have broken the blinding prior to reporting outcomes.
- *Probably Low risk of bias*: There is indirect evidence that the outcome was assessed using acceptable methods (i.e., deemed valid and reliable but not the gold standard), AND assessed at the same length of time after initial exposure in all study groups, OR it is deemed that the outcome assessment methods used would not appreciably bias results, AND there is indirect evidence that the outcome assessors were adequately blinded to the study group, and it is unlikely that they could have broken the blinding prior to reporting outcomes, OR it is deemed that lack of adequate blinding of outcome assessors would not appreciably bias results, which is more likely to apply to objective outcome measures. For some outcomes, particularly histopathology assessment, outcome assessors are not blind to study group as they require comparison to the control to appropriately judge the outcome, but additional measures such as multiple levels of independent review by trained pathologists can minimize this potential bias.
- *Probably High risk of bias*: There is indirect evidence that the outcome assessment method is an insensitive instrument, OR the length of time after initial exposure differed by study group, OR there is indirect evidence that it was possible for outcome assessors to infer the study group prior to reporting outcomes without sufficient quality control measures.
- *Definitely High risk of bias*: There is direct evidence that the outcome assessment method is an insensitive instrument, OR the length of time after initial exposure differed by study group,

OR there is direct evidence for lack of adequate blinding of outcome assessors, including no blinding or incomplete blinding without quality control measures.

- *Not Reported*: There is insufficient information provided about blinding of outcome assessors

#### **Q8. Were all measured outcomes reported?**

Selective reporting of results is a recommended element of assessing risk of bias (Guyatt, Oxman, Vist, et al., 2011; Higgins & Green, 2011b; Viswanathan M et al., 2012). Selective reporting is present if pre-specified outcomes are not reported or incompletely reported. It is likely widespread and difficult to assess with confidence for most studies unless the study protocol is available. Selective reporting bias can be assessed by comparing the “methods” and “results” section of the paper, and by considering outcomes measured in the context of knowledge in the field. Abstracts of presentations relating to the study may contain information about outcomes not subsequently mentioned in publications. Selective reporting bias should be suspected if the study does not report outcomes in the results section that would have been expected based on the methods, or if a composite score is present without the individual component outcomes (Guyatt, Oxman, Vist, et al., 2011). It may be useful to pay attention to author affiliations and funding source which can contribute to selective outcome reporting when results are not consistent with expectations or value to the research objectives.

- *Definitely Low risk of bias*: There is direct evidence that all of the study’s measured outcomes (primary and secondary) outlined in the protocol, methods, abstract, and/or introduction (that are relevant for the evaluation) have been reported. This would include outcomes reported with sufficient detail to be included in meta-analysis or fully tabulated during data extraction and analyses had been planned in advance.
- *Probably Low risk of bias*: There is indirect evidence that all of the study’s measured outcomes (primary and secondary) outlined in the protocol, methods, abstract, and/or introduction (that are relevant for the evaluation) have been reported OR analyses that had not been planned at the outset of the study (i.e., retrospective unplanned subgroup analyses) are clearly indicated as such and it is deemed that the omitted analyses were not appropriate and selective reporting would not appreciably bias results. This would include outcomes reported with insufficient detail such as only reporting that results were statistically significant (or not).
- *Probably High risk of bias*: There is indirect evidence that all of the study’s measured outcomes (primary and secondary) outlined in the protocol, methods, abstract, and/or introduction (that are relevant for the evaluation) have been reported.
- *Definitely High risk of bias*: There is direct evidence that all of the study’s measured outcomes (primary and secondary) outlined in the protocol, methods, abstract, and/or introduction (that



are relevant for the evaluation) have not been reported. In addition to not reporting outcomes, this would include reporting outcomes based on composite score without individual outcome components or outcomes reported using measurements, analysis methods or subsets of the data (e.g., subscales) that were not pre-specified or reporting outcomes not pre-specified (unless clear justification for their reporting is provided, such as an unexpected effect).

- *Not Reported*: There is insufficient information provided about selective outcome reporting.

**Q9. Were there any other potential threats to internal validity?**

This question was used to examine appropriateness of statistical methods, adherence to the study-protocol, and if the study design or analysis account for important confounding and modifying variables (including unintended co-exposures) in experimental studies.

- Statistics: Incorrect unit of measurement or incorrect analysis, i.e. confirmation of homogeneity of variance for ANOVA and other statistical tests that require normally distributed data.
- Deviations from the protocol: Evidence of deviations in the protocol are noted as direct (definitely high risk of bias) or indirect (probably high risk of bias).
- Unintended co-exposures for experimental studies: Evidence of other exposures that are anticipated to bias results are noted as direct (definitely high risk of bias) or indirect (probably high risk of bias) evidence of other exposures anticipated to bias results, if present and not appropriately adjusted for. Non-differential co-exposures that are likely to bias the results toward the null are considered in the context of the study findings.

---

## REFERENCES

- Arnold DL, Nera EA, Stapley R, Tolnai G, Claman P, Hayward S, et al. 1996. Prevalence of endometriosis in rhesus (*macaca mulatta*) monkeys ingesting pcb (aroclor 1254): Review and evaluation. *Fundamental and Applied Toxicology* 31:42-55.
- Bofinger DP, Feng L, Chi LH, Love J, Stephen FD, Sutter TR, et al. 2001. Effect of tcdd exposure on cyp1a1 and cyp1b1 expression in explant cultures of human endometrium. *Toxicological Sciences* 62:299-314.
- Bredhult C, Bäcklin BM, Olovsson M. 2007. Effects of some endocrine disruptors on the proliferation and viability of human endometrial endothelial cells in vitro. *Reproductive Toxicology* 23:550-559.
- Bredhult C, Sahlin L, Olovsson M. 2008. Gene expression analysis of human endometrial endothelial cells exposed to op'-ddt. *Molecular Human Reproduction* 14:97-106.
- Bruner-Tran KL, Rier SE, Eisenberg E, Osteen KG. 1999. The potential role of environmental toxins in the pathophysiology of endometriosis. *Gynecol Obstet Invest* 48 Suppl 1:45-56.
- Cano-Sancho G, Ploteau S, Matta K, Adoamnei E, Louis GB, Mendiola J, et al. 2019. Human epidemiological evidence about the associations between exposure to organochlorine chemicals and endometriosis: Systematic review and meta-analysis. *Environment International* 123:209-223.
- Chang KK, Liu LB, Jin LP, Zhang B, Mei J, Li H, et al. 2017. Il-27 triggers il-10 production in th17 cells via a c-maf/ror gamma t/blimp-1 signal to promote the progression of endometriosis. *Cell Death Dis* 8:12.
- Chiappini F, Bastón JI, Vaccarezza A, Singla JJ, Pontillo C, Miret N, et al. 2016. Enhanced cyclooxygenase-2 expression levels and metalloproteinase 2 and 9 activation by hexachlorobenzene in human endometrial stromal cells. *Biochemical Pharmacology* 109:91-104.
- Chiappini F, Sánchez M, Miret N, Cocca C, Zotta E, Ceballos L, et al. 2019. Exposure to environmental concentrations of hexachlorobenzene induces alterations associated with endometriosis progression in a rat model. *Food and Chemical Toxicology* 123:151-161.
- Cummings AM, Metcalf JL. 1995a. Induction of endometriosis in mice: A new model sensitive to estrogen. *Reproductive toxicology (Elmsford, NY)* 9:233-238.
- Cummings AM, Metcalf JL. 1995b. Effects of estrogen, progesterone, and methoxychlor on surgically induced endometriosis in rats. *Toxicological Sciences* 27:287-290.
- Cummings AM, Metcalf JL, Birnbaum L. 1996. Promotion of endometriosis by 2,3,7,8-tetrachlorodibenzo-p-dioxin in rats and mice: Time-dose dependence and species comparison. *Toxicology and Applied Pharmacology* 138:131-139.
- Cummings AM, Hedge JM, Birnbaum LS. 1999. Effect of prenatal exposure to tcdd on the promotion of endometriotic lesion growth by tcdd in adult female rats and mice. *Toxicological Sciences* 52:45-49.
- Foster WG, Ruka MP, Gareau P, Foster RA, Janzen EG, Yang JZ. 1997. Morphologic characteristics of endometriosis in the mouse model: Application to toxicology. *Can J Physiol Pharmacol* 75:1188-1196.

- Guyatt GH, Oxman AD, Kunz R, Brozek J, Alonso-Coello P, Rin D. . . . Schunemann HJ. (2011). GRADE guidelines Rating the quality of evidence. *J Clin Epidemiol*, 64(12), 1277-1316. doi:10.1016/j.jclinepi.2011.01.012
- Higgins JPT, Green S. 2011. *Cochrane Handbook for Systematic Reviews of Interventions Version 5.1.0*. Retrieved from [www.cochrane-handbook.org](http://www.cochrane-handbook.org)
- Holloway AC, Stys KA, Foster WG. 2005. Dde-induced changes in aromatase activity in endometrial stromal cells in culture. *Endocrine* 27:45-50.
- Holloway AC, Anger DA, Crankshaw DJ, Wu M, Foster WG. 2008. Atrazine-induced changes in aromatase activity in estrogen sensitive target tissues. *Journal of Applied Toxicology* 28:260-270.
- Hu T, Yao M, Fu X, Chen C, Wu R. 2018. Polychlorinated biphenyl 104 promotes migration of endometrial stromal cells in endometriosis. *Toxicol Lett*. 2018 Jun 15;290:19-28. doi: 10.1016/j.toxlet.2018.03.009.
- Huang Q, Chen Y, Chen Q, Zhang H, Lin Y, Zhu M, et al. 2017. Dioxin-like rather than non-dioxin-like pcbs promote the development of endometriosis through stimulation of endocrine–inflammation interactions. *Archives of Toxicology* 91:1915-1924.
- Igarashi TM, Bruner-Tran KL, Yeaman GR, Lessey BA, Edwards DP, Eisenberg E, et al. 2005. Reduced expression of progesterone receptor-b in the endometrium of women with endometriosis and in cocultures of endometrial cells exposed to 2,3,7,8-tetrachlorodibenzo-p-dioxin. *Fertility and Sterility* 84:67-74.
- Johnson KL, Cummings AM, Birnbaum LS. 1997. Promotion of endometriosis in mice by polychlorinated dibenzo-p-dioxins, dibenzofurans, and biphenyls. *Environmental Health Perspectives* 105:750-755.
- Khan Z, Zheng Y, Jones TL, Delaney AA, Correa LF, Shenoy CC, et al. 2018. Epigenetic therapy: Novel translational implications for arrest of environmental dioxin-induced disease in females. *Endocrinology* 159:477-489.
- Kitajima M, Khan KN, Fujishita A, Masuzaki H, Ishimaru T. 2004. Histomorphometric alteration and cell-type specific modulation of arylhydrocarbon receptor and estrogen receptor expression by 2,3,7,8-tetrachlorodibenzo-p-dioxin and 17 beta-estradiol in mouse experimental model of endometriosis. *Reproductive Toxicology* 18:793-801.
- Li MQ, Hou XF, Lv SJ, Meng YH, Wang XQ, Tang CL, et al. 2011. Cd82 gene suppression in endometrial stromal cells leads to increase of the cell invasiveness in the endometriotic milieu. *Journal of Molecular Endocrinology* 47:195-208.
- Nayyar T, Bruner-Tran KL, Piestrzeniewicz-Ulanska D, Osteen KG. 2007. Developmental exposure of mice to tcdd elicits a similar uterine phenotype in adult animals as observed in women with endometriosis. *Reproductive Toxicology* 23:326-336.
- NTP (National Toxicology Program). 2016. Monograph on Immunotoxicity Associated with Exposure to Perfluorooctanoic acid (PFOA) and perfluorooctane sulfonate (PFOS). Research Triangle Park, NC: National Toxicology Program. Available at: <https://ntp.niehs.nih.gov/whatwestudy/assessments/noncancer/completed/pfoa/index.html>. [accessed 15 May 2018].
- NTP (National Toxicology Program) OHAT. 2015a. Handbook for Conducting a Literature-Based Health Assessment Using OHAT Approach for Systematic Review and Evidence Integration. National Institute of Environmental Health Sciences. Available: <http://ntp.niehs.nih.gov/go/38673> [accessed 15 May 2018].

- NTP (National Toxicology Program) OHAT. 2015b. OHAT Risk of Bias Rating Tool for Human and Animal Studies. Available: <http://ntp.niehs.nih.gov/go/38673> [accessed 15 May 2018].
- OCDE 2018, Guidance Document on Good In Vitro Method Practices (GIVIMP), OECD Series on Testing and Assessment, n° 286, Éditions OCDE, Paris, <https://doi.org/10.1787/9789264304796-en>.
- Pitt JA, Feng L, Abbott BD, Schmid J, Batt RE, Costich TG, et al. 2001. Expression of ahr and arnt mrna in cultured human endometrial explants exposed to tcdd. *Toxicological Sciences* 62:289-298.
- Resuehr D, Glore DR, Taylor HS, Bruner-Tran KL, Osteen KG. 2012. Progesterone-dependent regulation of endometrial cannabinoid receptor type 1 (cb1-r) expression is disrupted in women with endometriosis and in isolated stromal cells exposed to 2,3,7,8-tetrachlorodibenzo-p-dioxin (tcdd). *Fertility and sterility* 98:948-956.e941.
- Rier SE, Martin DC, Bowman RE, Dmowski WP, Becker JL. 1993. Endometriosis in rhesus monkeys (macaca mulatta) following chronic exposure to 2,3,7,8-tetrachlorodibenzo-p-dioxin. *Fundamental and applied toxicology : official journal of the Society of Toxicology* 21:433-441.
- Shi YL, Luo XZ, Zhu XY, Hua KQ, Zhu Y, Li DJ. 2006. Effects of combined 17 beta-estradiol with tcdd on secretion of chemokine il-8 and expression of its receptor cxcr1 in endometriotic focus-associated cells in co-culture. *Human Reproduction* 21:870-879.
- Shi YL, Luo XZ, Zhu XY, Li DJ. 2007. Combination of 17 beta-estradiol with the environmental pollutant tcdd is involved in pathogenesis of endometriosis via up-regulating the chemokine i-309-ccr8. *Fertility and Sterility* 88:317-325.
- UNEP. 2017. Stockholm Convention Global Monitoring Plan on Persistent Organic Pollutants Second Monitoring Report. UNEP/POPS/COP.8/INF/38.
- van den Brand AD, Rubinstein E, de Jong PC, van den Berg M, van Duursen MBM. 2019. Primary endometrial 3d co-cultures: A comparison between human and rat endometrium. *The Journal of Steroid Biochemistry and Molecular Biology* 194:105458.
- Vernon MW, Wilson EA. 1985. Studies on the surgical induction of endometriosis in the rat. *Fertility and sterility* 44:684-694.
- Viswanathan M, Ansari M, Berkman ND, Chang S, Hartling L, McPheeters LM, . . . JR, T. 2012. Assessing the Risk of Bias of Individual Studies in Systematic Reviews of Health Care Interventions. *Methods Guide for Effectiveness and Comparative Effectiveness Reviews.*: Agency for Healthcare Research and Quality Methods Guide for Comparative Effectiveness Reviews. Retrieved from <https://effectivehealthcare.ahrq.gov/topics/methods-guidance-bias-individual-studies/methods>. doi:AHRQ Publication No. 12-EHC047-EF
- Wang XQ, Yu J, Luo XZ, Shi YL, Wang Y, Wang L, et al. 2010. The high level of rantes in the ectopic milieu recruits macrophages and induces their tolerance in progression of endometriosis. *Journal of Molecular Endocrinology* 45:291-299.
- Wang Y, Yu J, Luo X, Wang X, Li M, Wang L, et al. 2010. Abnormal regulation of chemokine teck and its receptor ccr9 in the endometriotic milieu is involved in pathogenesis of endometriosis by way of enhancing invasiveness of endometrial stromal cells. *Cellular & molecular immunology* 7:51-60.
- Wang Y, Chen H, Wang NL, Guo HY, Fu YL, Xue SG, et al. 2015. Combined 17 beta-estradiol with tcdd promotes m2 polarization of macrophages in the endometriotic milieu with aid of the interaction between endometrial stromal cells and macrophages. *Plos One* 10:12.
- Willing C, Peich M, Danescu A, Kehlen A, Fowler PA, Hombach-Klonisch S. 2011. Estrogen-independent actions of environmentally relevant ahr-agonists in human endometrial epithelial cells. *Molecular Human Reproduction* 17:115-126.

- Yang JH. 1999. Expression of dioxin-responsive genes in human endometrial cells in culture. *Biochemical and Biophysical Research Communications* 257:259-263.
- Yang JZ, Foster WG. 1997. Continuous exposure to 2,3,7,8-tetrachlorodibenzo-p-dioxin inhibits the growth of surgically induced endometriosis in the ovariectomized mouse treated with high dose estradiol. *Toxicology and Industrial Health* 13:15-25.
- Yang JZ, Yagminas A, Foster WG. 1997. Stimulating effects of 4-chlorodiphenyl ether on surgically induced endometriosis in the mouse. *Reproductive toxicology (Elmsford, NY)* 11:69-75.
- Zhao D, Pritts EA, Chao VA, Savouret JF, Taylor RN. 2002. Dioxin stimulates rantes expression in an in-vitro model of endometriosis. *Molecular Human Reproduction* 8:849-854.
